1 **ADMIXPIPE: Population analyses in ADMIXTURE for non-model**  
2 **organisms**

3 Steven M. Mussmann<sup>1</sup>, Marlis R. Douglas<sup>1</sup>, Tyler K. Chafin<sup>1</sup>, and Michael E. Douglas<sup>1</sup>

4 <sup>1</sup>Department of Biological Sciences, University of Arkansas, Fayetteville, AR 72701

5  
6 *Corresponding author and person to whom reprint requests should be addressed:*

7 Steven M. Mussmann

8 Department of Biological Sciences

9 University of Arkansas

10 Fayetteville, AR 72701

11 Voice: 479-575-5529

12 e-mail: smussmann@gmail.com

13

14

15 **Abstract**

16 **Background:** Research on the molecular ecology of non-model organisms, while  
17 previously constrained, has now been greatly facilitated by the advent of reduced-  
18 representation sequencing protocols. However, tools that allow these large datasets to  
19 be efficiently parsed are often lacking, or if indeed available, then limited by the  
20 necessity of a comparable reference genome as an adjunct. This, of course, can be  
21 difficult when working with non-model organisms. Fortunately, pipelines are currently  
22 available that avoid this prerequisite, thus allowing data to be *a priori* parsed. An oft-  
23 used molecular ecology program (i.e., STRUCTURE), for example, is facilitated by such  
24 pipelines, yet they are surprisingly absent for a second program that is similarly popular  
25 and computationally more efficient (i.e., ADMIXTURE). The two programs differ in that  
26 ADMIXTURE employs a maximum-likelihood framework whereas STRUCTURE uses a  
27 Bayesian approach, yet both produce similar results. Given these issues, there is an  
28 overriding (and recognized) need among researchers in molecular ecology for  
29 bioinformatic software that will not only condense output from replicated ADMIXTURE  
30 runs, but also infer from these data the optimal number of population clusters (K).

31  
32 **Results:** Here we provide such a program (i.e., ADMIXPIPE) that (a) filters SNPs to allow  
33 the delineation of population structure in ADMIXTURE, then (b) parses the output for  
34 summarization and graphical representation via CLUMPAK. Our benchmarks effectively  
35 demonstrate how efficient the pipeline is for processing large, non-model datasets  
36 generated via double digest restriction-site associated DNA sequencing (ddRAD).

37 Outputs not only parallel those from STRUCTURE, but also visualize the variation among  
38 individual ADMIXTURE runs, so as to facilitate selection of the most appropriate *K*-value.

39

40 **Conclusions:** ADMIXPIPE successfully integrates ADMIXTURE analysis with popular  
41 variant call format (VCF) filtering software to yield file types readily analyzed by  
42 CLUMPAK. Large population genomic datasets derived from non-model organisms are  
43 efficiently analyzed via the parallel-processing capabilities of ADMIXTURE. ADMIXPIPE is  
44 distributed under the GNU Public License and freely available for Mac OSX and Linux  
45 platforms at: <https://github.com/stevemussmann/admixturePipeline>.

46

47 **Keywords:** RADseq, SNP analysis, Population Genomics, Population Structure,  
48 ADMIXTURE analysis

49

## 50 **Background**

51 Advances in genomics during the past decade have accelerated research in  
52 molecular ecology by significantly increasing the capacity of researchers to generate  
53 vast quantities of data at relatively low cost. These advances largely represent the  
54 development of reduced representation genomic libraries [1–3] that identify tens of  
55 thousands of SNPs for non-model organisms, coupled with high-throughput sequencing  
56 methods that efficiently genotype fewer SNPs for thousands of individuals [4]. However,  
57 data generation, particularly through these novel and affordable marker-discovery  
58 methods [5], has greatly outpaced analytical capabilities, and especially so with regard  
59 to evolutionary and conservation genomics.

60           Here, technological advances have also precipitated a suite of new analytical  
61 issues. The thousands of SNPs generated in a typical RADseq project may exhibit  
62 biases that impact the inferences that can be drawn from these data [6], and which  
63 necessitate careful data filtration to avoid [7]. Yet, the manner by which data are filtered  
64 represents a double-edged sword. While it is certainly mandated (as above), the  
65 procedures involved must be carefully evaluated in the context of each study, in that  
66 downstream analyses can be seriously impacted [8, 9], to include the derivation of  
67 population structure [10].

68           For example, the analysis of multilocus codominant markers in evaluation of  
69 population structure is frequently accomplished using methods that make no *a priori*  
70 assumptions about underlying structure. One of the most popular options to accomplish  
71 this is the program STRUCTURE [11–13]. However, it necessitates that users test specific  
72 clustering values (K), and conduct *post hoc* evaluation of these results so as to  
73 determine an optimal K [14]. This typically involves searching a complicated parameter  
74 space using heuristic algorithms for Maximum Likelihood (ML) and Bayesian (BA)  
75 methods that, in turn, provide additional complications such as a tendency to sample  
76 local optima [15].

77           A common strategy to mitigate this is to sample multiple independent replicates  
78 at each K, using different random number seeds for initialization. These results are  
79 subsequently collated and evaluated to assess confidence that global rather than local  
80 optima have indeed been sampled. Clearly, this procedure must be automated so as to  
81 alleviate the onerous task of testing multiple replicates across a range of K-values.  
82 Pipelines to do so are available for STRUCTURE, and have been deployed on high-

83 performance computing systems via integrated parallelization (STRAUTO,  
84 PARALLELSTRUCTURE) [16, 17]. Multiple programs have likewise been developed for  
85 handling STRUCTURE output (i.e., CLUMPP, DISTRUCT) [18, 19]; and pipelines constructed  
86 to assess the most appropriate K-values (i.e., STRUCTUREHARVESTER, CLUMPAK) [20, 21].

87 Despite the considerable focus on STRUCTURE, few such resources have been  
88 developed for a popular alternative program (i.e., ADMIXTURE [22]). The Web of Science  
89 indexing service indicates that (as of January, 2020) it has been cited 1,812 times since  
90 initial publication (September, 2009). This includes 479 (26.4%) in 2019 alone. Despite  
91 its popularity, it has just a single option that promotes the program as part of a pipeline  
92 (i.e., SNIPLAY3 [23]), and unfortunately it requires a reference genome as an adjunct for  
93 its application. Needless to say, its applicability is thus limited for those laboratories that  
94 employ non-model organisms as study species.

95 Options for post-processing of ADMIXTURE results are similarly deficit. However,  
96 one positive is that CLUMPAK is flexible enough in its implementation to allow for the  
97 incorporation of ADMIXTURE output, as well as that of STRUCTURE. Furthermore, no  
98 available software currently exists that can summarize the variation in cross-validation  
99 (CV) values, the preferred method for selecting an optimal K-value in ADMIXTURE [24].

100 Here we describe a novel software package that integrates ADMIXTURE as the  
101 primary component of an analytical pipeline that also incorporates the filtering of data as  
102 part of its procedure. This, in turn, provides a high-throughput capability that not only  
103 generates input for ADMIXTURE but also evaluates the impact of filtering on population  
104 structure. ADMIXPIPE also automates the process of testing multiple K-values, conducts  
105 replicates at each K, and automatically formats these results as input for the CLUMPAK

106 pipeline. Optional post-processing scripts are also provided as a part of the toolkit to  
107 process CLUMPAK output, and to visualize the variability among CV values for  
108 independent ADMIXTURE runs. Sections of the pipeline are specifically designed for use  
109 with non-model organisms, as these are increasingly common study species in  
110 evolutionary and conservation genomic investigations.

111

## 112 **Implementation**

113 ADMIXPIPE requires two input files: a population map and a standard VCF file.  
114 The population map is a tab-delimited text file with each row representing a sample  
115 name/ population pair. The VCF file is filtered according to user-specified command line  
116 options that include the following: minor allele frequency (MAF) filter, biallelic filtering,  
117 data thinning measured in basepairs (bp), and missing data filtering (for both individuals  
118 and loci). Users may also remove specific samples from their analysis by specifying a  
119 file of sample names to be ignored. All filtering and the initial conversion to PLINK  
120 (PED/MAP) format [25] is handled by VCFTOOLS [26].

121 ADMIXPIPE is intended for use with non-model organisms that lack genomic  
122 reference data, and given this, additional conversions are required before the PLINK-  
123 formatted files will be accepted by ADMIXTURE. Popular software packages for *de novo*  
124 assembly of RADseq data, such as pyRAD [27, 28] produce VCF files with each locus  
125 as an individual “chromosome.” This, in turn, yields output that exceeds the number of  
126 chromosomes in those model organisms for which PLINK was originally designed. The  
127 initial MAP file is therefore modified to append a letter at the start of each “chromosome”

128 number. PLINK is then executed using the “--allow-extra-chr 0” option that treats loci as  
129 unplaced contigs in the final PED/ MAP files submitted to ADMIXTURE.

130 The main element of the pipeline executes ADMIXTURE on the filtered data. The  
131 assessment of multiple K values and multiple replicates is automated based upon user-  
132 specified command line input. The user defines minimum and maximum K values to be  
133 tested, in addition to the number of replicates for each K. Users may also specify the  
134 number of processor cores to be utilized by ADMIXTURE, and the cross-validation number  
135 which is utilized in determining optimal K. The final outputs of the pipeline include a  
136 compressed results file and a population file that are submitted as-is to CLUMPAK for  
137 processing and visualization.

138 The pipeline also offers two accessory scripts for processing of CLUMPAK output.  
139 The first (i.e., `distructRerun.py`) compiles the major clusters identified by CLUMPAK,  
140 generates DISTRUCT input files, executes DISTRUCT, and extracts CV-values for all major  
141 cluster runs. The second script (i.e., `cvSum.py`) plots the boxplots of CV-values against  
142 each K so as to summarize the distribution of CV-values for multiple ADMIXTURE runs.  
143 This permits the user to make an informed decision on the optimal K by graphing how  
144 these values vary according to independent ADMIXTURE runs.

145 ADMIXTURE is the only component of the pipeline that is natively parallelized.  
146 Therefore, we performed benchmarking to confirm that processing steps did not  
147 significantly increase runtime relative to that expected for ADMIXTURE. Data for  
148 benchmarking were selected from a recently published paper that utilized ADMIXPIPE for  
149 data processing [29]. The test data contained 343 individuals and 61,910 SNPs. Four  
150 data thinning intervals (i.e., 1, 25, 50, and 100) yielded SNP datasets of variable size for

151 performance testing. All filtering intervals were repeated with variable numbers of  
152 processor cores (i.e., 1, 2, 4, 8, and 16). Sixteen replicates of ADMIXTURE were first  
153 conducted for each K=1-8 at each combination of thinning interval and number of  
154 processor cores, for a total of 20 executions of the pipeline. The process was then  
155 repeated for each K=9-16, for an additional 20 runs of the pipeline. Memory profiling  
156 was conducted through the python3 'mprof' package at K=16, with a thinning interval of  
157 1 as a final test of performance. All tests were completed on a computer equipped with  
158 dual Intel Xeon E5-4627 3.30GHz processors, 256GB RAM, and with a 64-bit Linux  
159 environment.

160

## 161 **Results**

162 The filtering intervals resulted in datasets containing 61,910 (interval = 1bp),  
163 25,851 (interval = 25bp), 19,140 (interval = 50bp), and 12,527 SNPs (interval = 100bp).  
164 Runtime increased linearly with the number of SNPs analyzed, regardless of the  
165 number of processors utilized (Figure 1:  $R^2 = 0.975$ ,  $df = 58$ ). For example, increasing  
166 the number of SNPs from 12,527 to 61,910 (494% increase) produced an average  
167 increase of 519% in ADMIXPIPE runtime (SD = 41.6%).

168 Little change was observed in response to increasing the numbers of processor  
169 cores from K=1-8 (Figure 2A). A slight decrease in performance was observed in some  
170 cases, particularly for the largest dataset. This trend changed at higher K-values, as  
171 substantial gains were observed at K=9-16 when processors were increased from 1 to  
172 4. The most dramatic performance increase was observed for the 61,910 SNP dataset,  
173 where a 24.3-hour (34.5%) reduction in computation time occurred when processors



174 increased from 1 to 4. However, only marginal improvements occurred when processors  
175 were increased from 1 to 8 (24.5 hours; 34.7%) or 16 (26.2 hours; 37.7%).

176 Profiling also revealed efficient and consistent memory usage. The greatest  
177 memory spike occurred during the initial filtering steps, when peak memory usage  
178 reached approximately 120 MB. All subsequent usage held constant at ~60 MB as  
179 ADMIXTURE runs progressed.

180

## 181 **Discussion**

182 The performance of ADMIXPIPE improved with the number of processor cores  
183 utilized at higher K-values. However, it did not scale at the rate suggested in the original  
184 ADMIXTURE publication. We have been unable to attribute the difference in performance  
185 to any inherent property of our pipeline. Filtering and file conversion steps at the  
186 initiation of ADMIXPIPE are non-parallel sections. Reported times for completion of these  
187 steps were approximately constant across runs, with the maximum reported time being  
188 eight seconds. This indicates that ADMIXTURE itself is the main driver of performance, as  
189 it comprises the vast majority of system calls made by ADMIXPIPE.

190 The original performance increase documented for ADMIXTURE was 392% at K=3,  
191 utilizing four processor cores [24]. Unfortunately, we could not replicate this result with  
192 our benchmarking data [29], or the original test data (i.e., 324 samples; 13,928 SNPs)  
193 [24] which parallels our own. When we attempted to replicate the original benchmark  
194 scores, we found that it also failed to scale as the number of processor cores increased  
195 (1-core  $\bar{x}$  = 40.63 seconds,  $\sigma$  = 0.90; 4-core  $\bar{x}$  = 47.46 seconds,  $\sigma$  = 4.71). Furthermore,  
196 we verified that performance did increase with up to four processor cores at higher K

197 values ( $K \geq 9$ ). We therefore view this as ‘expected behavior’ for ADMIXTURE, and find no  
198 reason to believe that ADMIXPIPE has negatively impacted the performance of any  
199 individual program.

200 Results of ADMIXPIPE were similar to those found by STRUCTURE for the test  
201 dataset, as evaluated in an earlier publication [29], and gauged for the optimum  $K=8$ .  
202 This is not surprising, given that ADMIXTURE implements the same likelihood model as  
203 does STRUCTURE [22]. However, minor differences have previously been noted for both  
204 programs in the assignment probabilities [29, 30].

205 Memory usage was efficient and constant, with the greatest increase occurring  
206 when PLINK was executed. Thus, users will be able to execute ADMIXPIPE on their  
207 desktop machines for datasets sized similarly to that evaluated herein. Performance  
208 gains were minimal with  $>4$  processors, and this (again) reduces the necessity for  
209 supercomputer access, since desktop computers with  $\geq 4$  processor cores are now  
210 commonplace. However, given the built-in parallelization capabilities of ADMIXPIPE, its  
211 application on dedicated high-performance computing clusters will be beneficial when  
212 runtime considerations are necessary, such as when evaluating  $K > 8$ , or  $\text{SNPs} \geq 20,000$ .

213 Finally, our integration of common SNP filtering options provides the flexibility to  
214 quickly filter data and assess the manner by which various filtering decisions impact  
215 results. A byproduct of the filtering process is the production of a STRUCTURE-formatted  
216 file that will facilitate comparisons with other popular algorithms that assess population  
217 structure. These options are important tools, particularly given recent documentation  
218 regarding the impacts of filtering on downstream analyses. We thus suggest that

219 users implement existing recommendations on filtering RAD data, and use these to  
220 investigate subsequent impacts on their own data [7–10].

221

## 222 **Conclusions**

223         Benchmarking has demonstrated that the benefits of ADMIXPIPE (e.g., low  
224 memory usage and performance scaling with low numbers of processor cores at high K-  
225 values) will prove useful for researchers with limited access to advanced computing  
226 resources. ADMIXPIPE also allows the effects of common filtering options to be assessed  
227 on population structure of study species by coupling this process with the determination  
228 of population structure. Integration with CLUMPAK, and our custom options that allow  
229 plotting of data, to include variability in CV-values and customization of population-  
230 assignment plots, will facilitate the selection of appropriate K-values and allow variability  
231 to be assessed across runs. These benefits thus allow researchers to implement  
232 recommendations regarding assignment of population structure in their studies, and to  
233 accurately report the variability found in their results [31]. In conclusion, ADMIXPIPE is a  
234 new tool that successfully fills a contemporary gap found in pipelines that assess  
235 population structure. It is our hope that ADMIXPIPE, and its subsequent improvements  
236 will greatly facilitate the analysis of SNP data in non-model organisms.

237

238

239

## 240 **Acknowledgements**

241 Computational resources were provided by the Arkansas High Performance Computing  
242 Center (AHPCC) and the NSF Jetstream XSEDE Resource (XSEDE Allocation: TG-  
243 BIO160065). This research represents partial fulfillment of the Ph.D. degree (SMM) in  
244 Biological Sciences at University of Arkansas.

245

## 246 **Funding**

247 We acknowledge indirect financial support from the University of Arkansas in the form of  
248 university endowments. These include the Bruker Professorship in Life Sciences  
249 (MRD), the 21st Century Chair in Global Change Biology (MED), a Doctoral Academy  
250 Fellowship (SMM), and a Distinguished Doctoral Fellowship (TKC). Funding agencies  
251 played no role in the design and/or conclusions of this study.

252

## 253 **Availability of data and materials**

254 Data utilized for benchmarking was part of an earlier publication, and is available on  
255 Data Dryad (<https://datadryad.org/stash/dataset/doi:10.5061/dryad.d3q3220>). Source  
256 code for ADMIXPIPE is released under the GNU General Public License v3.0 at  
257 <https://github.com/stevemussmann/admixturePipeline>. The pipeline will run on Unix-  
258 based operating systems such as Mac OSX and Linux. It is compatible with Python 2.7+  
259 and Python 3.5+. Dependencies include other freely available software packages  
260 (ADMIXTURE, DISTRUCT, PLINK, and VCFTOOLS).

261

262

## 263 **Authors' Contributions**

264 SMM, MRD, and MED designed the study; SMM and TKC authored the Python code for  
265 ADMIXPIPE; TKC and SMM completed data analyses and program testing; all authors  
266 contributed in drafting the manuscript, and all approved the final version.

267

### 268 **Competing interests**

269 The authors declare that they have no competing interests.

270

### 271 **Consent for publication**

272 Not applicable.

273

### 274 **Ethics approval and consent to participate**

275 Not applicable.

276

277

## 278 **References**

- 279 1. Peterson BK, Weber JN, Kay EH, Fisher HS, Hoekstra HE. Double digest RADseq:  
280 an inexpensive method for *de novo* SNP discovery and genotyping in model and non-  
281 model species. PLoS ONE. 2012;7:1–11. doi:10.1371/journal.pone.0037135.
- 282 2. Ali OA, O'Rourke SM, Amish SJ, Meek MH, Luikart G, Jeffres C, et al. RAD capture  
283 (rapture): flexible and efficient sequence-based genotyping. Genetics. 2016;202:389.  
284 doi:10.1534/genetics.115.183665.
- 285 3. Miller MR, Dunham JP, Amores A, Cresko WA, Johnson EA. Rapid and cost-effective  
286 polymorphism identification and genotyping using restriction site associated DNA (RAD)  
287 markers. Genome Res. 2007;17:240–8. doi:10.1101/gr.5681207.
- 288 4. Campbell NR, Harmon SA, Narum SR. Genotyping-in-Thousands by sequencing  
289 (GT-seq): A cost effective SNP genotyping method based on custom amplicon  
290 sequencing. Mol Ecol Resour. 2015;15:855–67. doi:10.1111/1755-0998.12357.
- 291 5. Benestan LM, Ferchaud A-L, Hohenlohe PA, Garner BA, Naylor GJP, Baums IB, et  
292 al. Conservation genomics of natural and managed populations: building a conceptual  
293 and practical framework. Mol Ecol. 2016;25:2967–77. doi:10.1111/mec.13647.
- 294 6. DaCosta JM, Sorenson MD. Amplification biases and consistent recovery of loci in a  
295 double-digest RAD-seq protocol. PLoS ONE. 2014;9:1–14.  
296 doi:10.1371/journal.pone.0106713.
- 297 7. O'Leary SJ, Puritz JB, Willis SC, Hollenbeck CM, Portnoy DS. These aren't the loci  
298 you're looking for: Principles of effective SNP filtering for molecular ecologists. Mol Ecol.  
299 2018;27:3193–206. doi:10.1111/mec.14792.
- 300 8. Shafer ABA, Peart CR, Tusso S, Maayan I, Brelford A, Wheat CW, et al.  
301 Bioinformatic processing of RAD-seq data dramatically impacts downstream population  
302 genetic inference. Methods Ecol Evol. 2017;8:907–17. doi:10.1111/2041-210X.12700.
- 303 9. Linck E, Battey CJ. Minor allele frequency thresholds strongly affect population  
304 structure inference with genomic data sets. Mol Ecol Resour. 2019;19:639–47.  
305 doi:10.1111/1755-0998.12995.
- 306 10. Díaz-Arce N, Rodríguez-Ezpeleta N. Selecting RAD-Seq Data Analysis Parameters  
307 for Population Genetics: The More the Better? Front Genet. 2019;10:533.  
308 doi:10.3389/fgene.2019.00533.
- 309 11. Pritchard JK, Stephens M, Donnelly P. Inference of population structure using  
310 multilocus genotype data. Genetics. 2000;155:945–59.  
311 <http://www.genetics.org/content/155/2/945.abstract>.

- 312 12. Falush D, Stephens M, Pritchard JK. Inference of Population Structure Using  
313 Multilocus Genotype Data: Linked Loci and Correlated Allele Frequencies. *Genetics*.  
314 2003;164:1567. <http://www.genetics.org/content/164/4/1567.abstract>.
- 315 13. Hubisz MJ, Falush D, Stephens M, Pritchard JK. Inferring weak population structure  
316 with the assistance of sample group information. *Mol Ecol Resour*. 2009;9:1322–32.  
317 doi:10.1111/j.1755-0998.2009.02591.x.
- 318 14. Evanno G, Regnaut S, Goudet J. Detecting the number of clusters of individuals  
319 using the software Structure: a simulation study. *Mol Ecol*. 2005;14:2611–20.
- 320 15. Verdu P, Pemberton TJ, Laurent R, Kemp BM, Gonzalez-Oliver A, Gorodezky C, et  
321 al. Patterns of Admixture and Population Structure in Native Populations of Northwest  
322 North America. *PLOS Genet*. 2014;10:e1004530. doi:10.1371/journal.pgen.1004530.
- 323 16. Chhatre VE, Emerson KJ. STRAUTO: automation and parallelization of STRUCTURE  
324 analysis. *BMC Bioinformatics*. 2017;18:192. doi:10.1186/s12859-017-1593-0.
- 325 17. Besnier F, Glover KA. PARALLELSTRUCTURE: A R Package to Distribute Parallel  
326 Runs of the Population Genetics Program STRUCTURE on Multi-Core Computers. *PLOS*  
327 *ONE*. 2013;8:e70651. doi:10.1371/journal.pone.0070651.
- 328 18. Rosenberg NA. distruct: a program for the graphical display of population structure.  
329 *Mol Ecol Notes*. 2004;4:137–8. doi:10.1046/j.1471-8286.2003.00566.x.
- 330 19. Jakobsson M, Rosenberg NA. CLUMPP: a cluster matching and permutation program  
331 for dealing with label switching and multimodality in analysis of population structure.  
332 *Bioinformatics*. 2007;23:1801–6. doi:10.1093/bioinformatics/btm233.
- 333 20. Kopelman NM, Mayzel J, Jakobsson M, Rosenberg NA, Mayrose I. CLUMPAK: a  
334 program for identifying clustering modes and packaging population structure inferences  
335 across K. *Mol Ecol Resour*. 2015;15:1179–91. doi:10.1111/1755-0998.12387.
- 336 21. Earl DA, vonHoldt BM. STRUCTURE HARVESTER: a website and program for  
337 visualizing STRUCTURE output and implementing the Evanno method. *Conserv Genet*  
338 *Resour*. 2012;4:359–61. doi:10.1007/s12686-011-9548-7.
- 339 22. Alexander DH, Novembre J, Lange K. Fast model-based estimation of ancestry in  
340 unrelated individuals. *Genome Res*. 2009;19:1655–64. doi:10.1101/gr.094052.109.
- 341 23. Dereeper A, Homa F, Andres G, Sempere G, Sarah G, Hueber Y, et al. SNIPLAY3: a  
342 web-based application for exploration and large scale analyses of genomic variations.  
343 *Nucleic Acids Res*. 2015;43:W295–300. doi:10.1093/nar/gkv351.
- 344 24. Alexander DH, Lange K. Enhancements to the ADMIXTURE algorithm for individual  
345 ancestry estimation. *BMC Bioinformatics*. 2011;12:246. doi:10.1186/1471-2105-12-246.

- 346 25. Purcell S, Neale B, Todd-Brown K, Thomas L, Ferreira MAR, Bender D, et al. PLINK:  
347 a tool set for whole-genome association and population-based linkage analyses. *Am J*  
348 *Hum Genet.* 2007;81:559–75. <http://www.ncbi.nlm.nih.gov/pmc/articles/PMC1950838/>.
- 349 26. Danecek P, Auton A, Abecasis G, Albers CA, Banks E, DePristo MA. The variant  
350 call format and VCFtools. *Bioinformatics.* 2011;27. doi:10.1093/bioinformatics/btr330.
- 351 27. Eaton DA. PyRAD: assembly of *de novo* RADseq loci for phylogenetic analyses.  
352 *Bioinformatics.* 2014;30:1844–9. doi:10.1093/bioinformatics/btu121.
- 353 28. Eaton DAR, Overcast I. ipyrad: Interactive assembly and analysis of RADseq  
354 datasets. *Bioinformatics.* 2020. doi:10.1093/bioinformatics/btz966.
- 355 29. Chafin TK, Douglas MR, Martin BT, Douglas ME. Hybridization drives genetic  
356 erosion in sympatric desert fishes of western North America. *Heredity.* 2019;123:759–  
357 73. doi:10.1038/s41437-019-0259-2.
- 358 30. Raj A, Stephens M, Pritchard JK. fastSTRUCTURE: Variational Inference of  
359 Population Structure in Large SNP Data Sets. *Genetics.* 2014;197:573–89.  
360 doi:10.1534/genetics.114.164350.
- 361 31. Janes JK, Miller JM, Dupuis JR, Malenfant RM, Gorrell JC, Cullingham CI, et al. The  
362 K = 2 conundrum. *Mol Ecol.* 2017;26:3594–602. doi:10.1111/mec.14187.
- 363
- 364



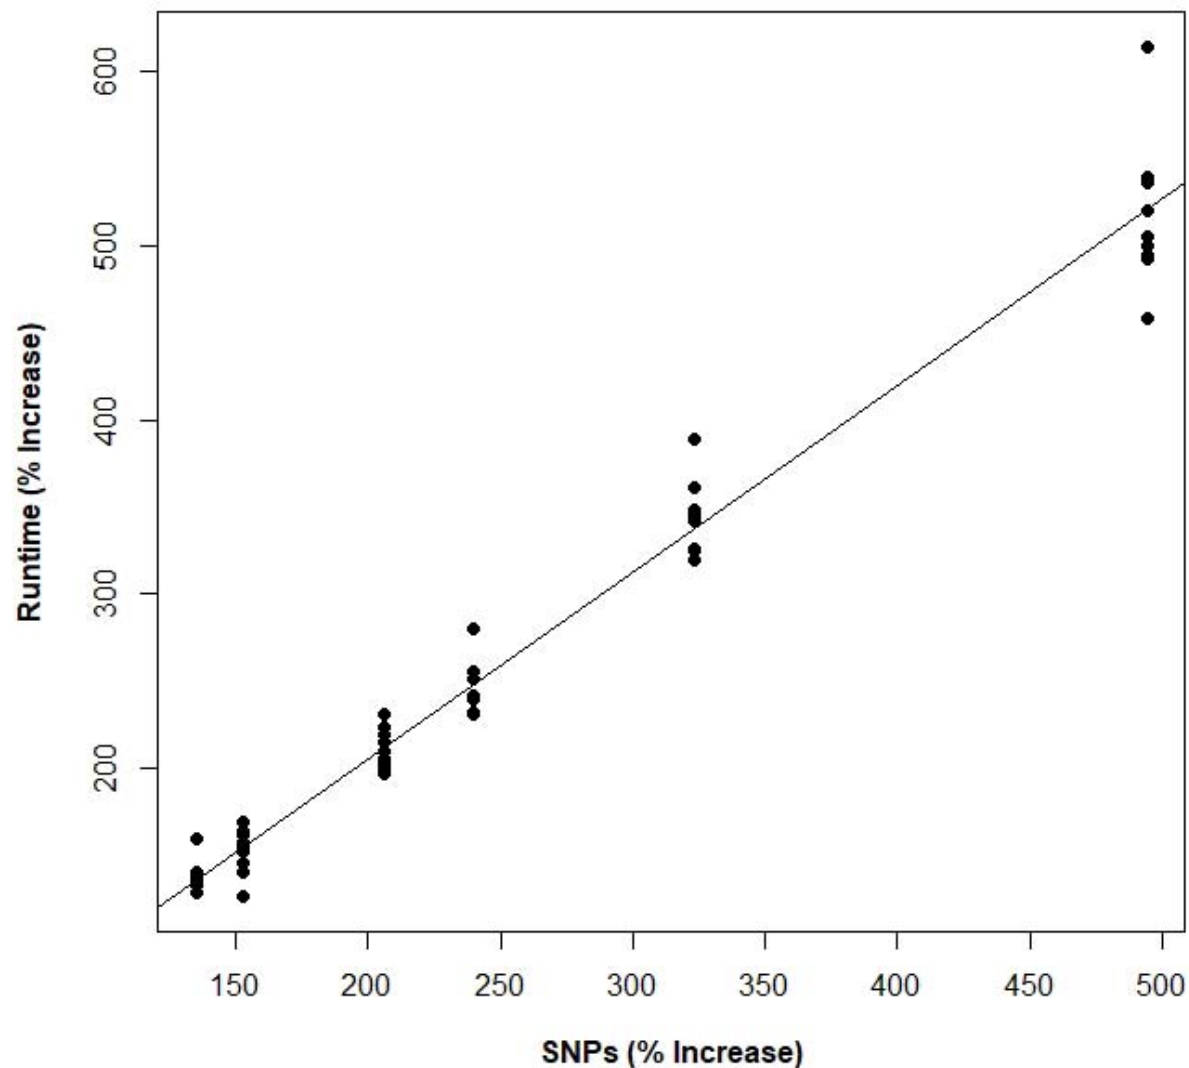

365

366 **Figure 1.** The percent increase in runtime for ADMIXPIPE exhibits a nearly 1:1 ratio with  
367 respect to percent increase in the number of SNPs. Data is based upon pairwise  
368 comparisons in runtime and input size increases for four datasets of varying size  
369 (61,910 SNPs, 25,851 SNPs, 19,140 SNPs, and 12,527 SNPs).  $R^2 = 0.975$ , degrees of  
370 freedom=58.

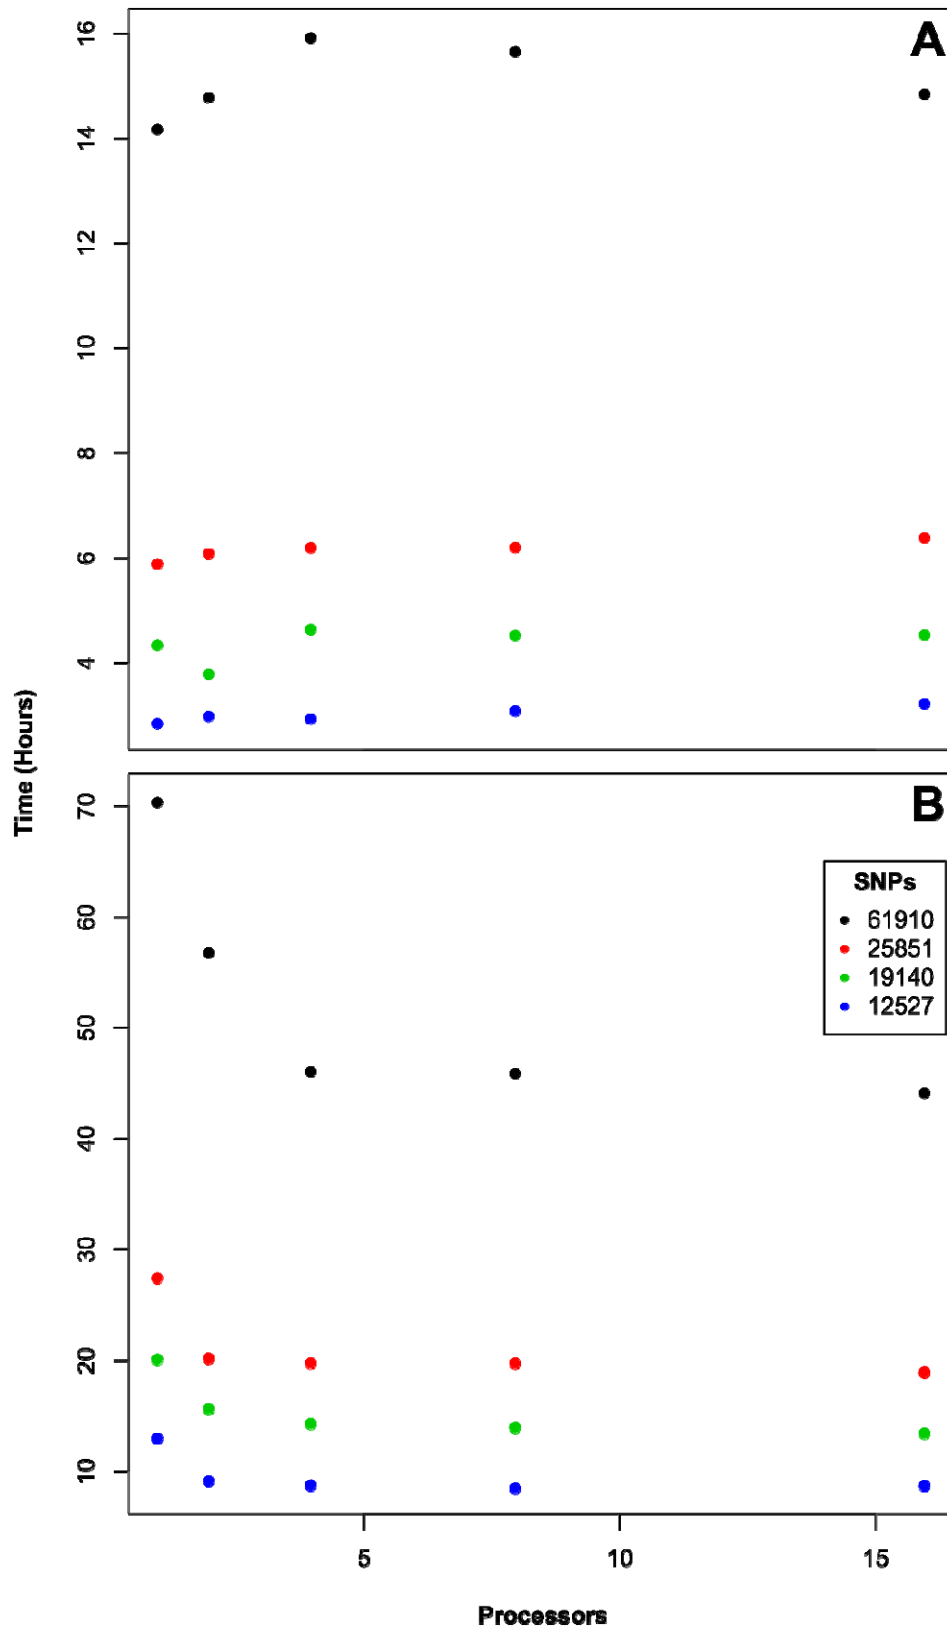

372 **Figure 2.** Results of benchmarking ADMIXPIPE for two ranges of population clustering  
373 (K) values. Time is presented in hours on the Y-axis. Plot A shows total runtime for 20  
374 replicates each of K=1-8. Plot B shows total runtime for 16 replicates each of K=9-16.  
375 The number of processor cores (CPU=1, 2, 4, 8, and 16) was varied across runs. Four  
376 data thinning intervals (1, 25, 50, and 100) produced variable numbers of SNPs  
377 (61,910, 25,851, 19,140, and 12,527 respectively).
